# Supplementary material for: Genetic Ablation of Ankrd1 Mitigates Cardiac Damage during Experimental Autoimmune Myocarditis in Mice
Source: MDPI journal article supplement (doi:10.3390/biom12121898), 2022-12-18
Supplement: s1 [file s1]

## Supplementary Material

**Figure S1. Validation of ANKRD1 loss in *Ankrd1*<sup>-/-</sup> (KO) mice.** (A) PCR products from mouse tail DNA samples which were amplified using primers listed in Table S1 (Supplementary Materials). M – low range DNA marker, NTC – no tissue control, Ctrl<sup>+/+</sup> – DNA from WT BALB/c mice tail, Ctrl<sup>-/-</sup> – DNA from primary F0 generation KO mice. (B) Representative Western blot and (C) corresponding quantitative densitometric analysis of ANKRD1 in WT (*n* = 3) and KO (*n* = 3) mice hearts lysates. GAPDH was used as a loading control. Data are represented as the mean ± 95% CI. \*\*(*p* < 0.01) – marks statistically significant differences, by 2-tailed *Student's t-test* with unequal variances.

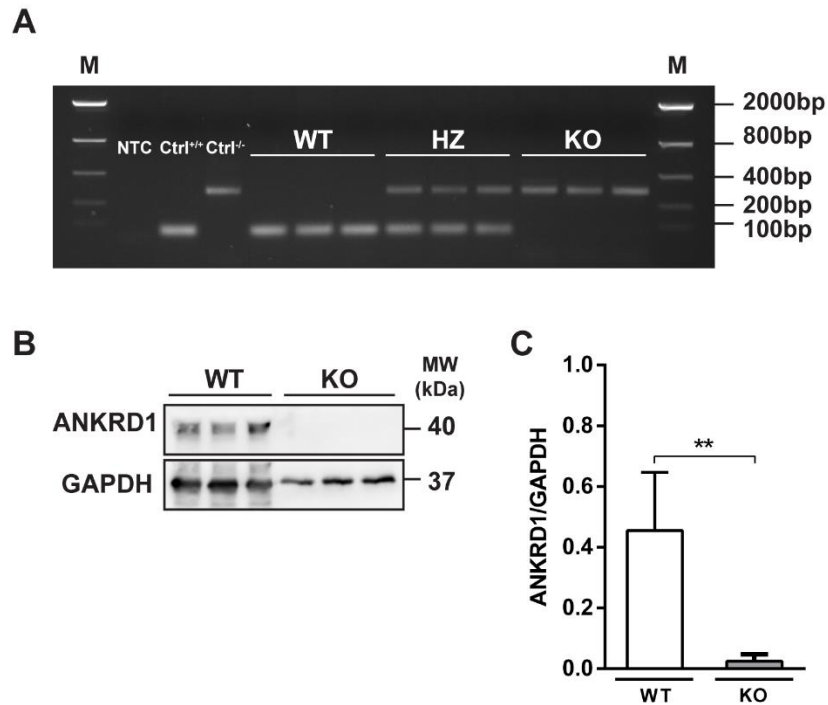

**Figure S2. Body weight changes in mice after EAM induction.** WT-Sham (*n* = 5), WT- $\alpha$ -MHC (*n* = 8), KO-Sham (*n* = 5) and KO- $\alpha$ -MHC (*n* = 11). The values are represented as mean ± SEM.

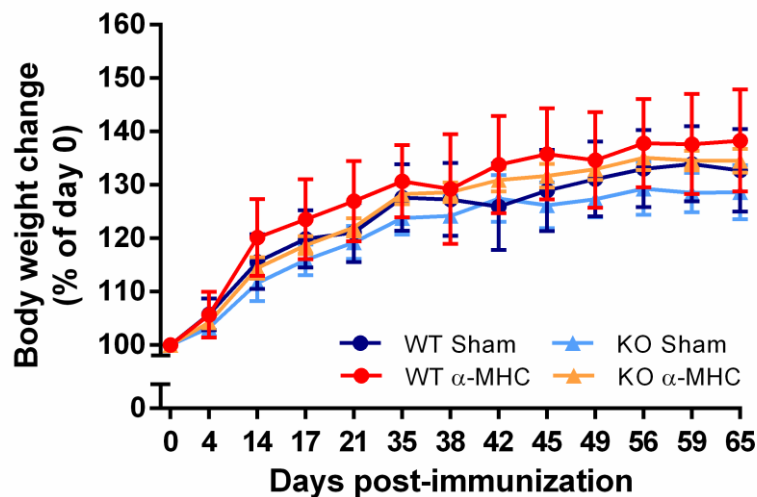

**Figure S3.** Representative original uncropped echocardiographic images of Sham and  $\alpha$ -MHC mice prior immunization and at 65 day post-immunization used for the preparation of Figure 1.

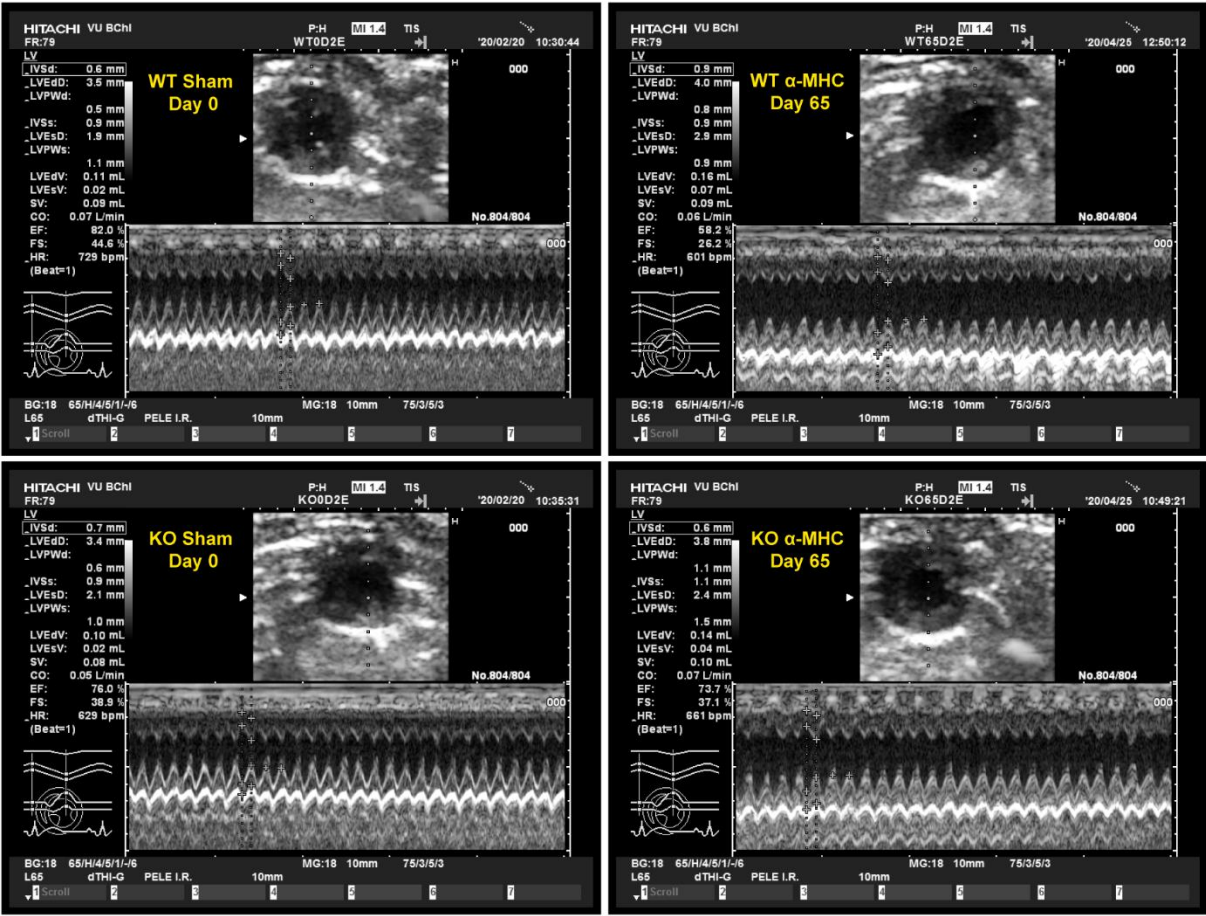

**Figure S4.** Images of original uncropped Western blots used for the preparation of Figure 3.

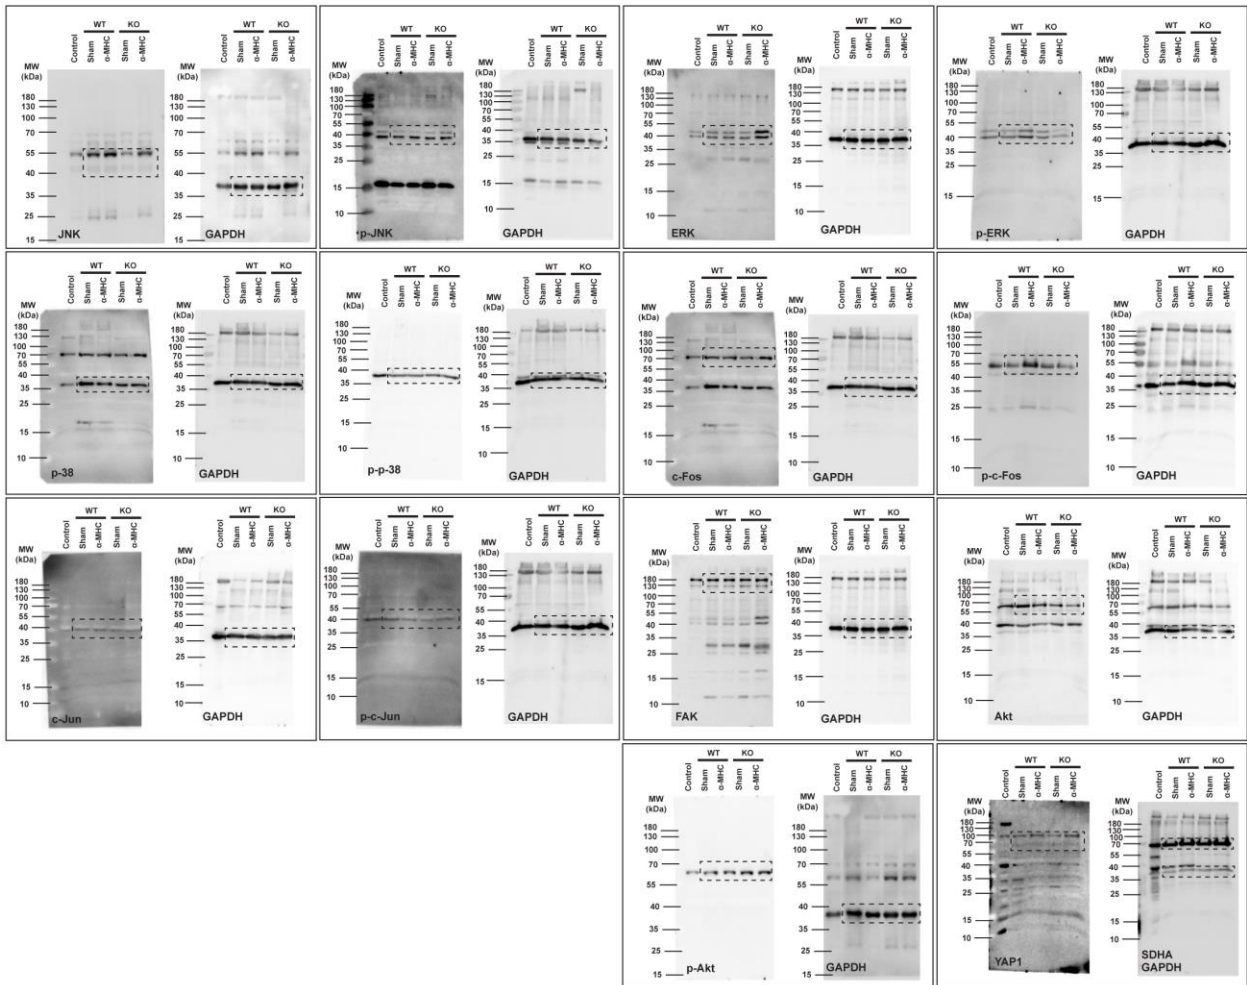

**Table S1.** Primers used in PCR for mice genotyping.

| Primer | Primer Sequences                 | Length | WT | HZ | KO |
|--------|----------------------------------|--------|----|----|----|
| NeoFwd | FW: 5'-TCATTCTCAGTATTGTTTGCC- 3' | 268 bp | -  | +  | +  |
| SD     | RV: 5'-TCTACTAGAGGATATTTTAAC- 3' |        |    |    |    |
| TUF    | FW: 5'-AAGGCAGGCACCTGGGATAC- 3'  | 68 bp  | +  | +  | -  |
| TUR    | RV: 5'-CAGCGACAGCCACCTTCAG- 3'   |        |    |    |    |

**Table S2.** Primer sequences of genes analyzed by real-time PCR.

| Gene          | Primers                                                                      |
|---------------|------------------------------------------------------------------------------|
| <i>Col1a1</i> | FW: 5'- TCACCAAACCTCAGAAGATGTAGGA -3'<br>RV: 5'- GACCAGGAGGACCAGGAAG -3'     |
| <i>Col3a1</i> | FW: 5'- ACAGCAGTCCAACGTAGATGAAT -3'<br>RV: 5'- TCACAGATTATGTCATCGCAAAG -3'   |
| <i>Nppa</i>   | FW: 5'- CCCCCACCCACGCCAGCAT -3'<br>RV: 5'- TCGGCCCCCTGCTTCTCA -3'            |
| <i>Nppb</i>   | FW: 5'- AAGCTGCTGGAGCTGATAAGA -3'<br>RV: 5'- GTTACAGCCCAAACGACTGAC -3'       |
| <i>Ankrd1</i> | FW: 5'- GCATTTCCTCAACAGAAGAGC -3'<br>RV: 5'- AAGTCTTGCTCCCCCAAAT -3'         |
| <i>Acta</i>   | FW: 5'- TTGCTGACAGGATGCAGAAGGAGA -3'<br>RV: 5'- ATCTGCTGGAAGGTAGACAGCGAA -3' |
| <i>Cd44</i>   | FW: 5'- ATCAGCAGATCGATTGTAATGTAA -3'<br>RV: 5'- CATTTCTTCTATGAACCATACC -3'   |
| <i>18S</i>    | FW: 5'- GGAAGGGCACCACAGGAGT -3'<br>RV: 5'- TGCAGCCCCGACATCTAAG -3'           |

**Table S3.** List of antibodies used in Western blotting.

| Antibody name             | Company                                         | Dilution |
|---------------------------|-------------------------------------------------|----------|
| ANKRD1                    | (3119) Myomedix, Neckargemünd, Germany          | 1:500    |
| JNK                       | (9258s) Cell Signaling, Danvers, MA, USA        | 1:1000   |
| p-JNK                     | (700031) Thermo Scientific, Waltham, MA, USA    | 1:1000   |
| ERK                       | (ab184699) Abcam, Cambridge, UK                 | 1:1000   |
| p-ERK                     | (sc-16982) Santa Cruz Biotechnology, Dallas, TX | 1:500    |
| p38                       | (331300) Thermo Scientific, Waltham, MA, USA    | 1:1000   |
| p-p38                     | (MA5-15177) Thermo Scientific, Waltham, MA, USA | 1:1000   |
| c-Fos                     | (MA536080) Thermo Scientific, Waltham, MA, USA  | 1:2000   |
| p-c-Fos                   | (PA5-105995) Invitrogen, Carlsbad, CA, USA      | 1:1000   |
| c-Jun                     | (ab40766) Abcam, Cambridge, UK                  | 1:1000   |
| p-c-Jun                   | (558036) BD Biosciences, San Jose, CA, USA      | 1:500    |
| FAK                       | (sc-558) Santa Cruz Biotechnology, Dallas, TX   | 1:1000   |
| YAP1                      | (PA5-86396) Invitrogen, Carlsbad, CA, USA       | 1:1000   |
| Akt                       | (710005) Invitrogen, Carlsbad, CA, USA          | 1:500    |
| p-Akt                     | (4060) Cell Signaling, Danvers, MA, USA         | 1:1000   |
| GAPDH                     | (PA1-987) Invitrogen, Carlsbad, CA, USA         | 1:1000   |
| HRP-Goat- anti Rabbit IgG | (4750) Carl Roth, GmbH, Germany                 | 1:10 000 |
| HRP-Goat anti Mouse IgG   | (4759) Carl Roth, GmbH, Germany                 | 1:10 000 |

**Table S4.** Echocardiographic analysis of WT and *Ankrd1* KO mice hearts before and after EAM induction.

| Group                               | Days post-immunization | LVEdD (mm)<br>Mean ± 95% CI                                                                                                    | LVEsD (mm)<br>Mean ± 95% CI                                                                                                     | FS (%)<br>Mean ± 95% CI                                                                        | HR (bpm)<br>Mean ± 95% CI                                                                          |
|-------------------------------------|------------------------|--------------------------------------------------------------------------------------------------------------------------------|---------------------------------------------------------------------------------------------------------------------------------|------------------------------------------------------------------------------------------------|----------------------------------------------------------------------------------------------------|
| WT Sham (n=5)                       | 0                      | 3.41 ± 0.26                                                                                                                    | 1.65 ± 0.29                                                                                                                     | 51.77 ± 7.6                                                                                    | 589 ± 68                                                                                           |
|                                     | 21                     | 3.49 ± 0.24                                                                                                                    | 1.83 ± 0.21                                                                                                                     | 47.75 ± 3.96                                                                                   | 669 ± 55                                                                                           |
|                                     | 40                     | 3.6 ± 0.21                                                                                                                     | 1.99 ± 0.36                                                                                                                     | 46.97 ± 4.59                                                                                   | 557 ± 79                                                                                           |
|                                     | 65                     | 3.71 ± 0.23                                                                                                                    | 2.03 ± 0.33                                                                                                                     | 48.6 ± 4.69                                                                                    | 628 ± 123                                                                                          |
| The main effect of measurement time |                        | $F(3, 8.86) = 1.99$ ,<br>$p = 0.186$ , $\eta^2 = 0.58$                                                                         | $F(3, 8.69) = 2.03$ ,<br>$p = 0.182$ , $\eta^2 = 0.69$                                                                          | $F(3, 8.75) = 0.69$ ,<br>$p = 0.578$ , $\eta^2 = 0.58$                                         | $F(3, 8.33) = 2.17$ ,<br>$p = 0.166$ , $\eta^2 = 0.53$                                             |
| WT $\alpha$ -MHC (n=8)              | 0                      | 3.42 ± 0.21                                                                                                                    | 1.77 ± 0.31                                                                                                                     | 48.04 ± 9.39                                                                                   | 500 ± 75                                                                                           |
|                                     | 21                     | 3.87 ± 0.35                                                                                                                    | 2.4 ± 0.53                                                                                                                      | 38.55 ± 8.94                                                                                   | 578 ± 66                                                                                           |
|                                     | 40                     | 4.03 ± 0.29 ***                                                                                                                | 2.65 ± 0.39 ***                                                                                                                 | 34.58 ± 5.77                                                                                   | 564 ± 52                                                                                           |
|                                     | 65                     | 4.18 ± 0.24 ****                                                                                                               | 2.82 ± 0.32 ****                                                                                                                | 30.58 ± 4.30 #                                                                                 | 562 ± 87                                                                                           |
| The main effect of measurement time |                        | $F(3, 15.31) = 10.79$ ,<br>$p = 0.00046$ , $\eta^2 = 0.69$                                                                     | $F(3, 15.33) = 10.49$ ,<br>$p = 0.00053$ , $\eta^2 = 0.72$                                                                      | $F(3, 14.88) = 5.33$ ,<br>$p = 0.011$ , $\eta^2 = 0.75$                                        | $F(3, 15.3) = 1.18$ ,<br>$p = 0.348$ , $\eta^2 = 0.35$                                             |
| KO Sham (n=5)                       | 0                      | 3.23 ± 0.21                                                                                                                    | 1.82 ± 0.13                                                                                                                     | 43.52 ± 4.43                                                                                   | 602 ± 60                                                                                           |
|                                     | 21                     | 3.37 ± 0.16                                                                                                                    | 1.91 ± 0.06                                                                                                                     | 43.11 ± 2.92                                                                                   | 625 ± 90                                                                                           |
|                                     | 40                     | 3.52 ± 0.2                                                                                                                     | 2.04 ± 0.13 #                                                                                                                   | 42.02 ± 2.84                                                                                   | 656 ± 55                                                                                           |
|                                     | 65                     | 3.53 ± 0.16                                                                                                                    | 2.11 ± 0.08 **                                                                                                                  | 40.18 ± 3.47                                                                                   | 640 ± 84                                                                                           |
| The main effect of measurement time |                        | $F(3, 8.85) = 3.73$ ,<br>$p = 0.055$ , $\eta^2 = 0.72$                                                                         | $F(3, 8.53) = 12.03$ ,<br>$p = 0.002$ , $\eta^2 = 0.86$                                                                         | $F(3, 8.79) = 1.18$ ,<br>$p = 0.373$ , $\eta^2 = 0.56$                                         | $F(3, 8.73) = 1.03$ ,<br>$p = 0.425$ , $\eta^2 = 0.35$                                             |
| KO $\alpha$ -MHC (n=11)             | 0                      | 3.07 ± 0.14                                                                                                                    | 1.74 ± 0.11                                                                                                                     | 43.29 ± 3.14                                                                                   | 582 ± 48                                                                                           |
|                                     | 21                     | 3.57 ± 0.17 ****                                                                                                               | 2.18 ± 0.18 **                                                                                                                  | 38.96 ± 3.19                                                                                   | 628 ± 50                                                                                           |
|                                     | 40                     | 3.74 ± 0.16 ****                                                                                                               | 2.39 ± 0.23 ****                                                                                                                | 36.24 ± 4.73                                                                                   | 674 ± 21 #                                                                                         |
|                                     | 65                     | 3.93 ± 0.19 ****                                                                                                               | 2.56 ± 0.26 ****                                                                                                                | 34.25 ± 4.46 #                                                                                 | 645 ± 38                                                                                           |
| The main effect of measurement time |                        | $F(3, 17.48) = 27.88$ ,<br>$p < 0.0001$ , $\eta^2 = 0.88$                                                                      | $F(3, 17.1) = 17.29$ ,<br>$p < 0.0001$ , $\eta^2 = 0.72$                                                                        | $F(3, 17.59) = 4.2$ ,<br>$p = 0.021$ , $\eta^2 = 0.6$                                          | $F(3, 16.23) = 4.38$ ,<br>$p = 0.019$ , $\eta^2 = 0.52$                                            |
| Interaction among groups            | 0                      | $F(3, 10.93) = 5.28$ ,<br>$p = 0.017$ , $\eta^2 = 0.71$<br>(WT $\alpha$ -MHC vs. KO $\alpha$ -MHC*)                            | $F(3, 11.24) = 0.77$ ,<br>$p = 0.531$ , $\eta^2 = 0.51$                                                                         | $F(3, 11.1) = 2.71$ ,<br>$p = 0.095$ , $\eta^2 = 0.66$                                         | $F(3, 11.76) = 2.24$ ,<br>$p = 0.136$ , $\eta^2 = 0.64$                                            |
|                                     | 21                     | $F(3, 12.03) = 3.48$ ,<br>$p = 0.05$ , $\eta^2 = 0.85$                                                                         | $F(3, 10.67) = 4.71$ ,<br>$p = 0.025$ , $\eta^2 = 0.76$                                                                         | $F(3, 11.8) = 5.99$ ,<br>$p = 0.01$ , $\eta^2 = 0.72$                                          | $F(3, 11.48) = 2.18$ ,<br>$p = 0.145$ , $\eta^2 = 0.58$                                            |
|                                     | 40                     | $F(3, 11.53) = 4.32$ ,<br>$p = 0.028$ , $\eta^2 = 0.88$                                                                        | $F(3, 11.17) = 5.91$ ,<br>$p = 0.011$ , $\eta^2 = 0.76$<br>(WT Sham vs. WT $\alpha$ -MHC*)                                      | $F(3, 11.96) = 7.63$ ,<br>$p = 0.0041$ , $\eta^2 = 0.83$<br>(WT Sham vs. WT $\alpha$ -MHC**)   | $F(3, 8.89) = 4.13$ ,<br>$p = 0.014$ , $\eta^2 = 0.77$<br>(WT $\alpha$ -MHC vs. KO $\alpha$ -MHC*) |
|                                     | 65                     | $F(3, 12.11) = 10.01$ ,<br>$p = 0.0013$ , $\eta^2 = 0.85$<br>(WT Sham vs. WT $\alpha$ -MHC*;<br>KO Sham vs. KO $\alpha$ -MHC*) | $F(3, 10.53) = 11.44$ ,<br>$p = 0.0012$ , $\eta^2 = 0.82$<br>(WT Sham vs. WT $\alpha$ -MHC**;<br>KO Sham vs. KO $\alpha$ -MHC*) | $F(3, 11.95) = 17.99$ ,<br>$p < 0.0001$ , $\eta^2 = 0.94$<br>(WT Sham vs. WT $\alpha$ -MHC***) | $F(3, 9.43) = 1.38$ ,<br>$p = 0.31$ , $\eta^2 = 0.6$                                               |

LVEdD, left ventricular end-diastolic dimension; LVEsD, left ventricular end-systolic dimension; FS, fractional shortening; HR, heart rate. \* - marks statistically significant differences between groups, # - differences from 0 day. \*, # ( $p < 0.05$ ), \*\*, ## ( $p < 0.01$ ), \*\*\*, ### ( $p < 0.001$ ), by robust ANOVA followed by *lincon post hoc*.

**Table S5.** The list of features used for PCA.

| No | Feature                                             |
|----|-----------------------------------------------------|
| 1  | Left ventricle end-diastolic diameter (mm) (Day 0)  |
| 2  | Left ventricle end-systolic diameter (mm) (Day 0)   |
| 3  | Left ventricle fractional shortening (%) (Day 0)    |
| 4  | Left ventricle end-diastolic diameter (mm) (Day 21) |
| 5  | Left ventricle end-systolic diameter (mm) (Day 21)  |
| 6  | Left ventricle fractional shortening (%) (Day 21)   |
| 7  | Left ventricle end-diastolic diameter (mm) (Day 40) |
| 8  | Left ventricle end-systolic diameter (mm) (Day 40)  |
| 9  | Left ventricle fractional shortening (%) (Day 40)   |
| 10 | Left ventricle end-diastolic diameter (mm) (Day 65) |
| 11 | Left ventricle end-systolic diameter (mm) (Day 65)  |
| 12 | Left ventricle fractional shortening (%) (Day 65)   |
| 13 | Lung siderophages (cells/mm <sup>2</sup> )          |
| 14 | Lung weight/tibia length (mg/mm)                    |
| 15 | Heart weight/tibia length (mg/mm)                   |
| 16 | <i>Nppa</i> (relative mRNA level)                   |
| 17 | <i>Nppb</i> (relative mRNA level)                   |
| 18 | Gross score (from 0-5)                              |
| 19 | Infiltrates (nuclei/tissue area (%))                |
| 20 | Fibrosis (% of total area)                          |
| 21 | <i>Cd44</i> (relative mRNA level)                   |
| 22 | <i>Col1a1</i> (relative mRNA level)                 |
| 23 | <i>Col3a1</i> (relative mRNA level)                 |
| 24 | <i>Acta2</i> (relative mRNA level)                  |
| 25 | p-JNK/JNK                                           |
| 26 | p-ERK/ERK                                           |
| 27 | p-p38/p38                                           |
| 28 | p-c-Fos/c-Fos                                       |
| 29 | p-c-Jun/c-Jun                                       |
| 30 | FAK/GAPDH                                           |
| 31 | p-Akt/Akt                                           |
| 32 | YAP1/GAPDH                                          |
